# Supplementary material for: Profiling of Intestinal Microbiota in Patients Infected with Respiratory Influenza A and B Viruses
Source: MDPI journal article supplement (doi:10.3390/pathogens10060761), 2021-06-17
Supplement: s1 [file s1]

## Supplementary Materials

**Table S1.** Differential abundance testing identified 15 OTUs that were differentially abundant amongst influenza positive patients and controls.

| Bacterial taxa                             | Phylum                | p-value | P-adj* | Higher in Infected | Higher in Controls |
|--------------------------------------------|-----------------------|---------|--------|--------------------|--------------------|
| s__ <i>Prevotella copri</i>                | <i>Bacteroidetes</i>  | 0.000   | 0.000  | yes                |                    |
| s__ <i>Faecalibacterium prausnitzii</i>    | <i>Firmicutes</i>     | 0.000   | 0.000  |                    | yes                |
| g__ <i>Dialister</i> unclassified          | <i>Firmicutes</i>     | 0.000   | 0.002  | yes                |                    |
| f__ <i>Lachnospiraceae</i> unclassified    | <i>Firmicutes</i>     | 0.000   | 0.005  |                    | yes                |
| f__ <i>Barnesiellaceae</i> unclassified    | <i>Bacteroidetes</i>  | 0.000   | 0.005  |                    | yes                |
| f__ <i>Veillonellaceae</i> unclassified    | <i>Firmicutes</i>     | 0.000   | 0.016  | yes                |                    |
| f__ <i>Enterobacteriaceae</i> unclassified | <i>Proteobacteria</i> | 0.000   | 0.016  |                    | yes                |
| s__ <i>Escherichia coli</i>                | <i>Proteobacteria</i> | 0.001   | 0.017  |                    | yes                |
| s__ <i>Faecalibacterium prausnitzii</i>    | <i>Firmicutes</i>     | 0.001   | 0.017  |                    | yes                |
| f__ <i>Lachnospiraceae</i> unclassified    | <i>Firmicutes</i>     | 0.001   | 0.023  |                    | yes                |
| f__ <i>Victivallaceae</i> unclassified     | <i>Lentisphaerae</i>  | 0.001   | 0.026  |                    | yes                |
| f__ <i>Lachnospiraceae</i> unclassified    | <i>Firmicutes</i>     | 0.001   | 0.026  |                    | yes                |
| g__ <i>Dialister</i> unclassified          | <i>Firmicutes</i>     | 0.001   | 0.026  | yes                |                    |
| g__ <i>Dialister</i> unclassified          | <i>Firmicutes</i>     | 0.001   | 0.026  | yes                |                    |
| f__ <i>Lachnospiraceae</i> unclassified    | <i>Firmicutes</i>     | 0.001   | 0.028  | yes                |                    |

\* P-adj: Adjusted p-value. Only significant adjusted p-values of less than 0.033 are presented in this table. S for species, g for genus and f for family.

**Table S2.** Differential abundance testing identified 10 OTUs that were differentially abundant amongst influenza A and influenza B infected patients. .

| Bacterial taxa                        | Phylum         | p-value | P-adj* | Higher in Influenza A | Higher in influenza B |
|---------------------------------------|----------------|---------|--------|-----------------------|-----------------------|
| f__Lachnospiraceae unclassified       | Firmicutes     | 0.000   | 0.002  |                       | yes                   |
| g__Sutterella unclassified            | Proteobacteria | 0.000   | 0.002  | yes                   |                       |
| f__Erysipelotrichaceae unclassified   | Firmicutes     | 0.000   | 0.004  |                       | yes                   |
| g__Roseburia unclassified             | Firmicutes     | 0.000   | 0.005  |                       | yes                   |
| f__Lachnospiraceae unclassified       | Firmicutes     | 0.000   | 0.013  |                       | yes                   |
| g__Megasphaera_unclassified           | Firmicutes     | 0.000   | 0.013  | yes                   |                       |
| f__Veillonellaceaeunclassified        | Firmicutes     | 0.000   | 0.013  | yes                   |                       |
| s__Roseburia_faecis                   | Firmicutes     | 0.001   | 0.015  |                       | yes                   |
| f__S24-7/ Muribaculaceae unclassified | Bacteroidetes  | 0.001   | 0.015  |                       | yes                   |
| f__Lachnospiraceae_unclassified       | Firmicutes     | 0.001   | 0.015  |                       | yes                   |

\* P-adj: Adjusted p-value. Only significant adjusted p-values of less than 0.033 are presented in this table. S for species, g for genus and f for family. .

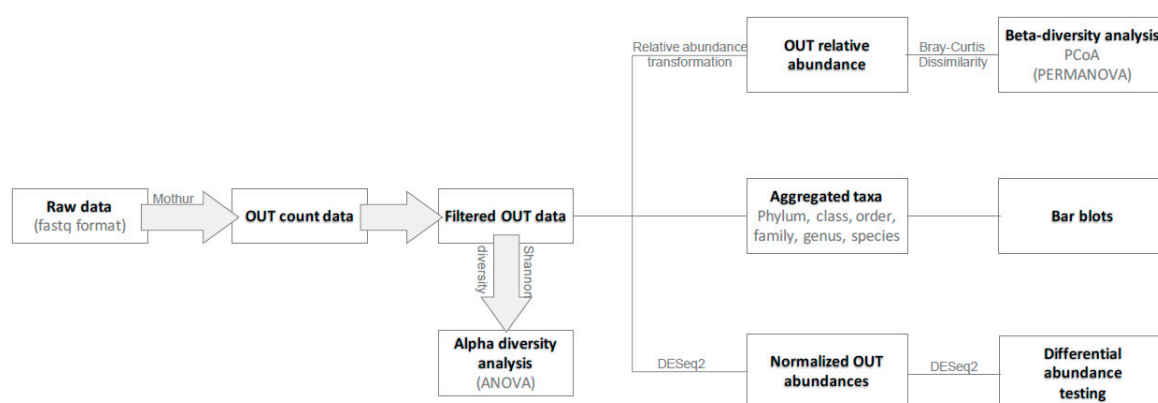

**Figure S1.** Analytical flowchart presenting a short guide to analysis and statistical tools used in this microbiome study.

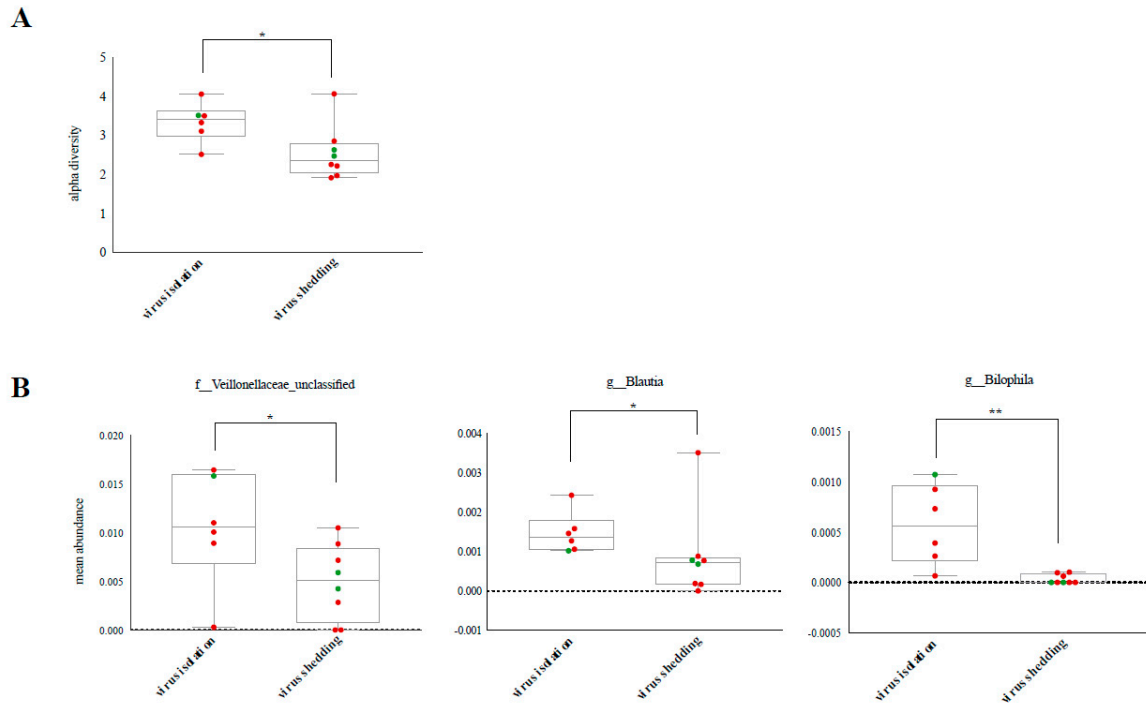

**Figure S2.** Statistical analysis of alpha diversity (A) and mean relative abundance (B) of OTUs identified in fecal samples of shedders and fecal samples from which infectious virion was isolated. (A) Comparison of alpha diversity between the two groups. Dots represents samples and are color-coded as follows: red for H1N1 and green for H3N2. (B) Comparison of mean relative abundance of all genera identified in samples of both groups. P values less than 0.05 are indicated with one asterisk, and P values less than 0.01 are summarized with two asterisks. Only genera that showed significance ( $p < 0.05$ ) are presented here.

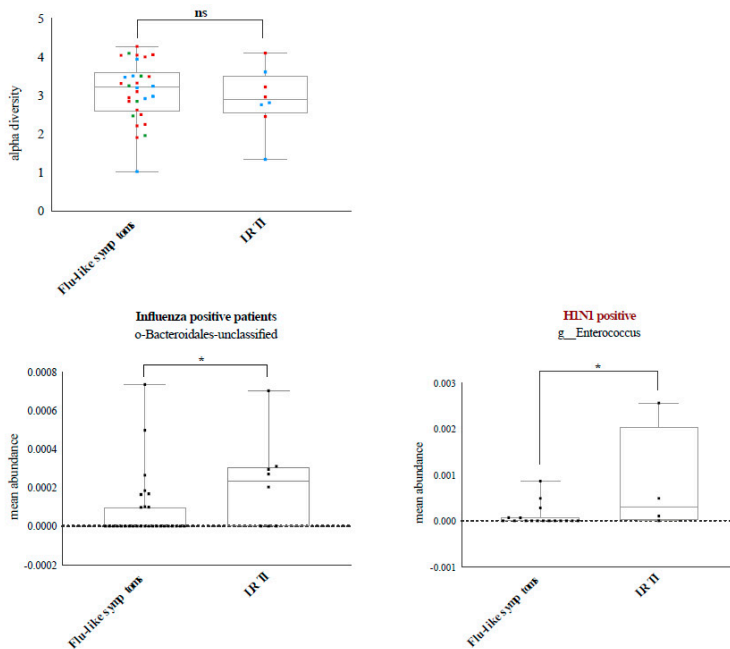

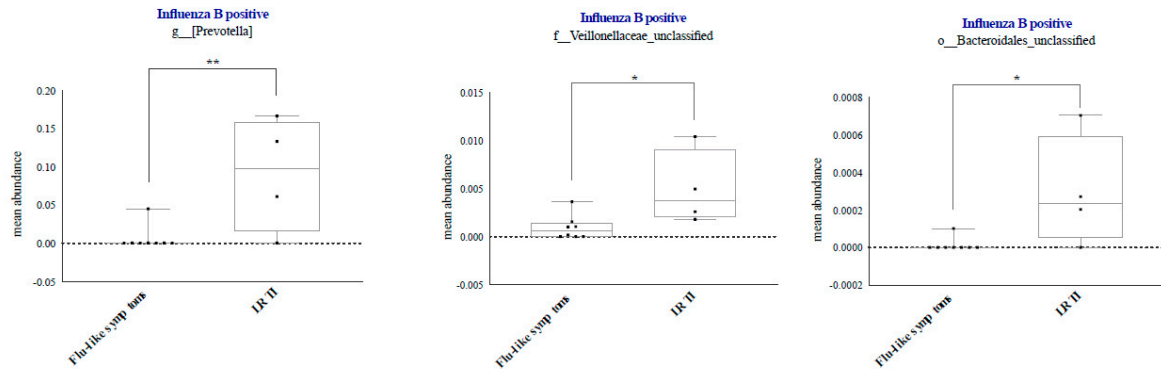

**Figure 3.** Statistical analysis of (A) alpha diversity and (B) mean relative abundance of OTUs identified in patients suffering from severe respiratory infection and those with typical flu symptoms. (A) Comparison of alpha diversity of patients suffering from lower respiratory tract infection (LRTI) and patients with typical flu symptoms (fever, cough, sore throat and body pain). Dots represents samples and are color-coded as follows: red for H1N1, blue for influenza B and green for H3N2. (B) Comparison of mean abundances of each of identified genera between patients with LRTI and patients with typical flu symptoms. P values less than 0.05 are indicated with one asterisk, and P values less than 0.01 are summarized with two asterisks. Only genera that showed significance ( $p < 0.05$ ) are presented here.
